# Supplementary material for: Abstract 18013: Impact of Chronic Kidney Disease on Risk of Incident Atrial Fibrillation and Subsequent Survival in Medicare Patients
Source: MDPI journal article supplement (doi:10.3390/antiox13030372), 2010-11-23
Supplement: s1 [file s1]

**Table S1.** HPLC-MS/MS retention time and calibration data for phenolics.

| Compound                                         | Figure | Retention time, min (standard) | Retention time, min (sample) | Calibration curve | Coefficient of determination ( $r^2$ ) |
|--------------------------------------------------|--------|--------------------------------|------------------------------|-------------------|----------------------------------------|
| Neochlorogenic acid                              | S1     | 2.68                           | 2.74                         | 132.157x-36.1651  | 0.996665                               |
| Kaempferol-3- <i>O</i> -rutinoside (Nictoflorin) | S1     | 5.67                           | 5.72                         | 104.758x-25.1861  | 0.999235                               |
| Quercetin 3- <i>O</i> -glucoside (Isoquercitrin) | S1     | 5.49                           | 5.53                         | 371.928x+61.7969  | 0.991011                               |
| Luteolin-4- <i>O</i> -glucoside (Juncein)        | S1     | 5.89                           | 5.92                         | 701.516x+148.51   | 0.986978                               |
| Luteolin-7-rutinoside (Scolymoside)              | S1     | 5.55                           | 5.59                         | 362.482x-38.6976  | 0.998807                               |
| Procyanidin B1                                   | S1     | 3.55                           | 3.59                         | 24.889x-10.2825   | 0.987535                               |
| Procyanidin C1                                   | S1     | 4.6                            | 4.65                         | 31.3648x-7.97714  | 0.999019                               |
| (+)-Catechin                                     | S2     | 3.81                           | 3.85                         | 7.65941x-1.7829   | 0.985683                               |
| Chlorogenic acid                                 | S2     | 3.91                           | 3.94                         | 123.701x-15.508   | 0.992902                               |
| Phloridzin                                       | S2     | 6.07                           | 6.12                         | 1024.59x+15.3622  | 0.998189                               |
| Quercetin                                        | S2     | 7.05                           | 7.09                         | 408.567x-184.72   | 0.996974                               |
| Isorhamnetin-3- <i>O</i> -rutinoside (Narcissin) | S2     | 5.75                           | 5.78                         | 513.81x-36.5168   | 0.999203                               |
| Ferulic acid                                     | S2     | 5.45                           | 5.49                         | 135.218x-13.05    | 0.994858                               |
| Procyanidin B2                                   | S2     | 4.17                           | 4.2                          | 83.8582x-12.343   | 0.996484                               |
| (-)-Epicatechin                                  | S3     | 4.37                           | 4.44                         | 8.52997x-2.9562   | 0.996997                               |
| Caffeic acid                                     | S3     | 4.17                           | 4.23                         | 36.2607x+1.12917  | 0.990083                               |
| Kaempferol-3- <i>O</i> -glucoside (Astragalin)   | S3     | 5.87                           | 5.92                         | 418.643x+63.4945  | 0.998666                               |
| Quercetin-3- <i>O</i> -rutinoside (Rutin)        | S3     | 5.31                           | 5.35                         | 209.907x-11.322   | 0.998333                               |
| Quercetin-3- <i>O</i> -galactoside (Hyperoside)  | S3     | 5.44                           | 5.48                         | 366.477x-121.168  | 0.99818                                |

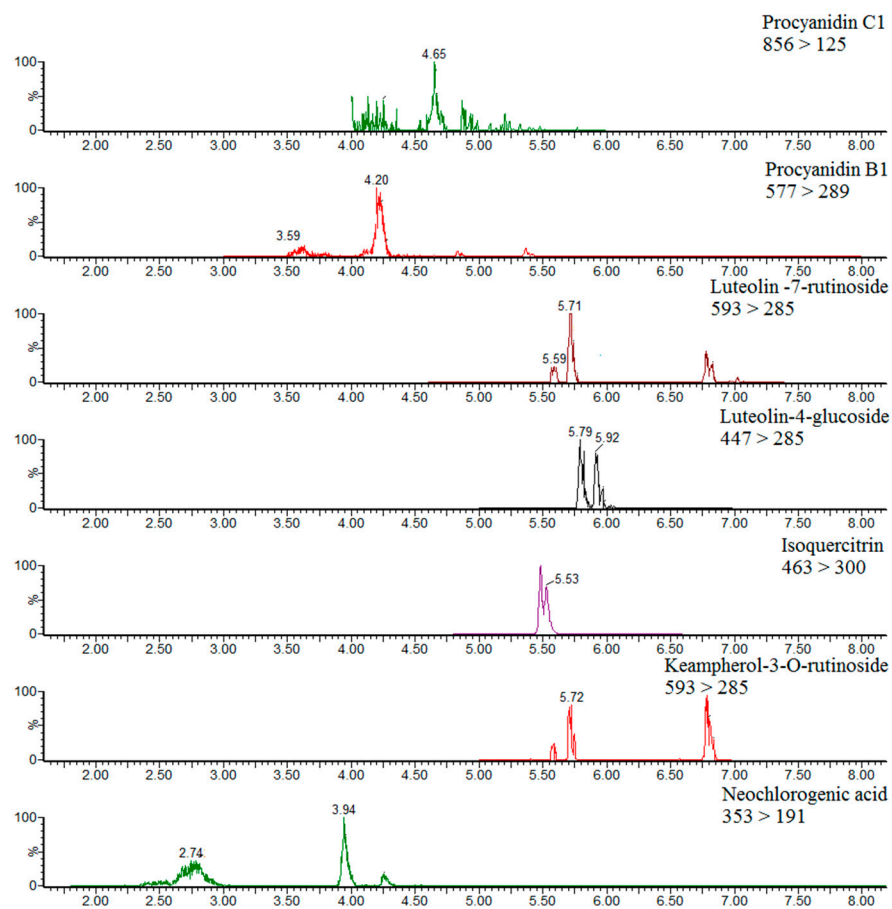

(A)

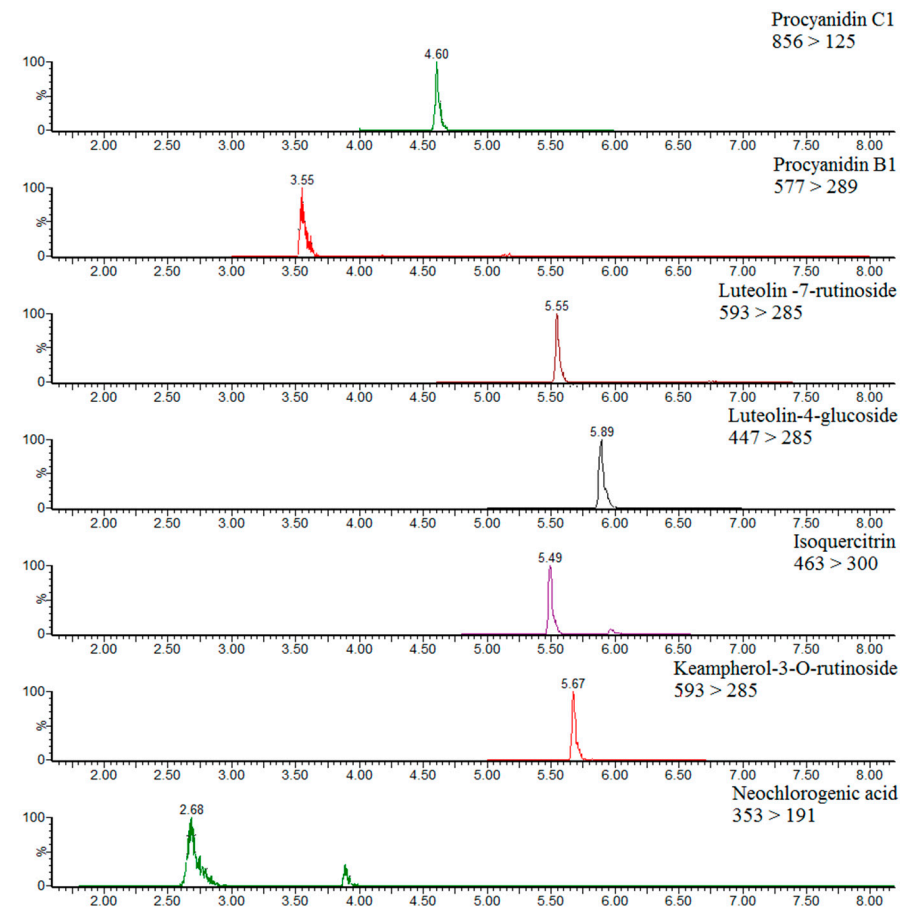

(B)

**Figure S1.** MS/MS chromatograms of *A. kolomikta* (A) and phenolic compounds standard mixture (B): procyanidin C1, procyanidin B1, luteolin-7-rutinoside, luteolin-4-*O*-glucoside, isoquercitrin, kaempferol-3-*O*-rutinoside, and neochlorogenic acid.

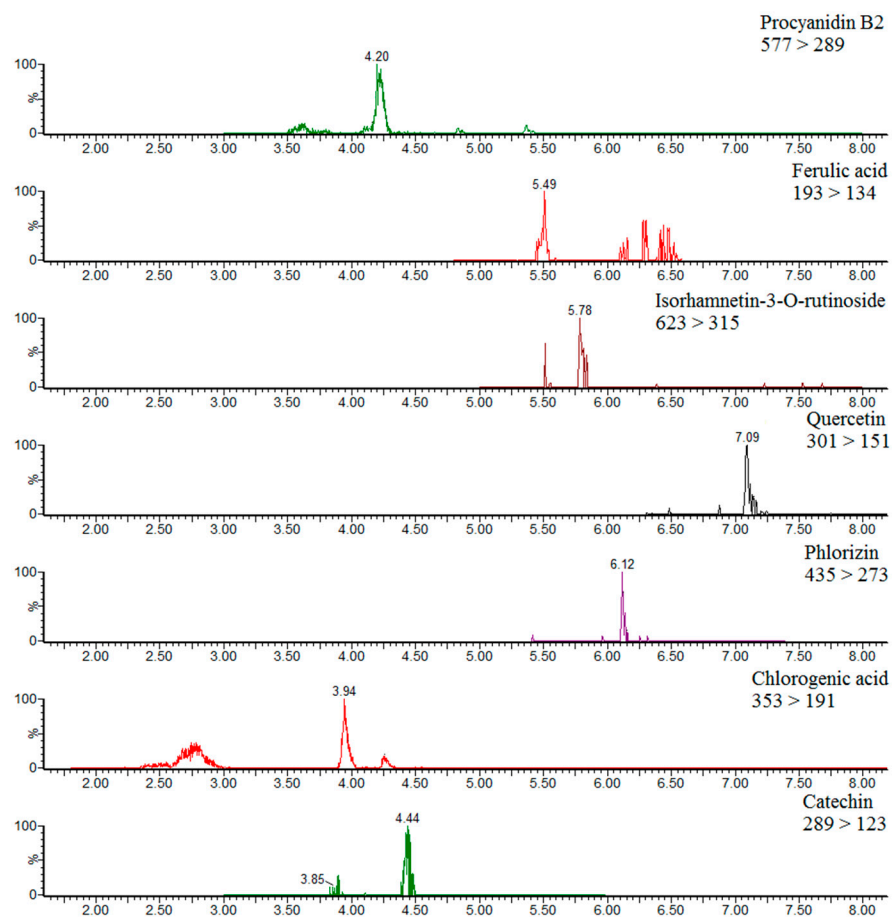

(A)

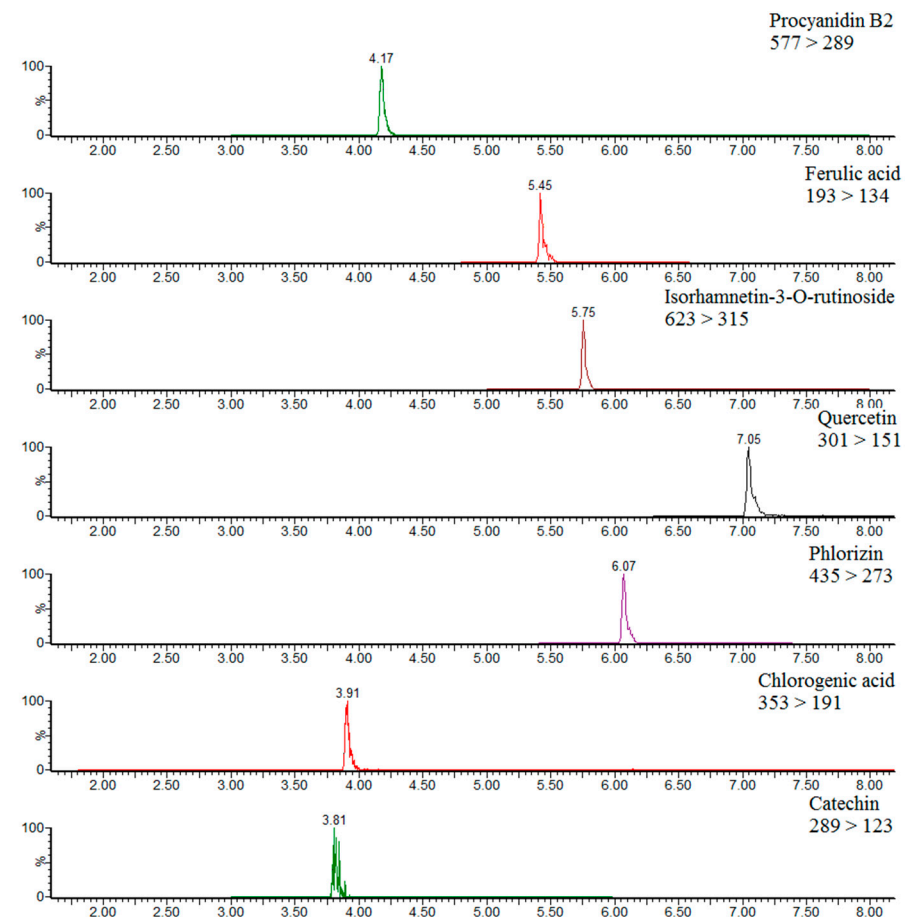

(B)

**Figure S2.** MS/MS chromatograms of *A. kolomikta* (A) and phenolic compounds standard mixture (B): procyanidin B1, ferulic acid, isorhamnetin-3-O-rutinoside, quercetin, phlorizin, chlorogenic acid, and catechin.

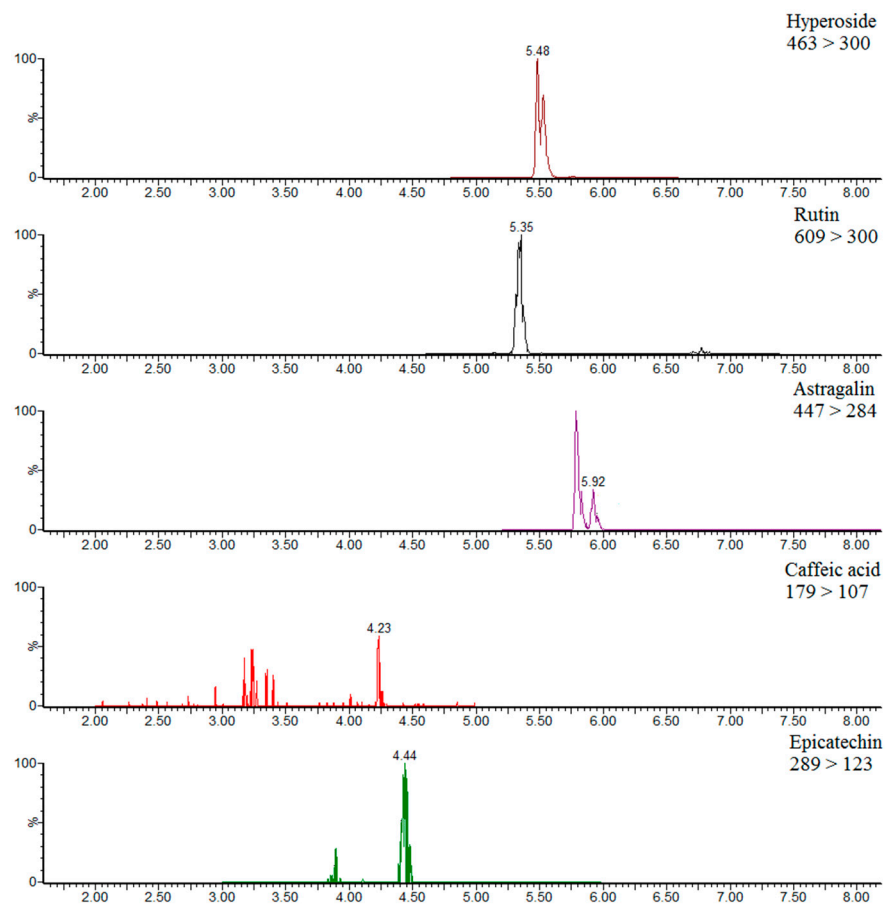

(A)

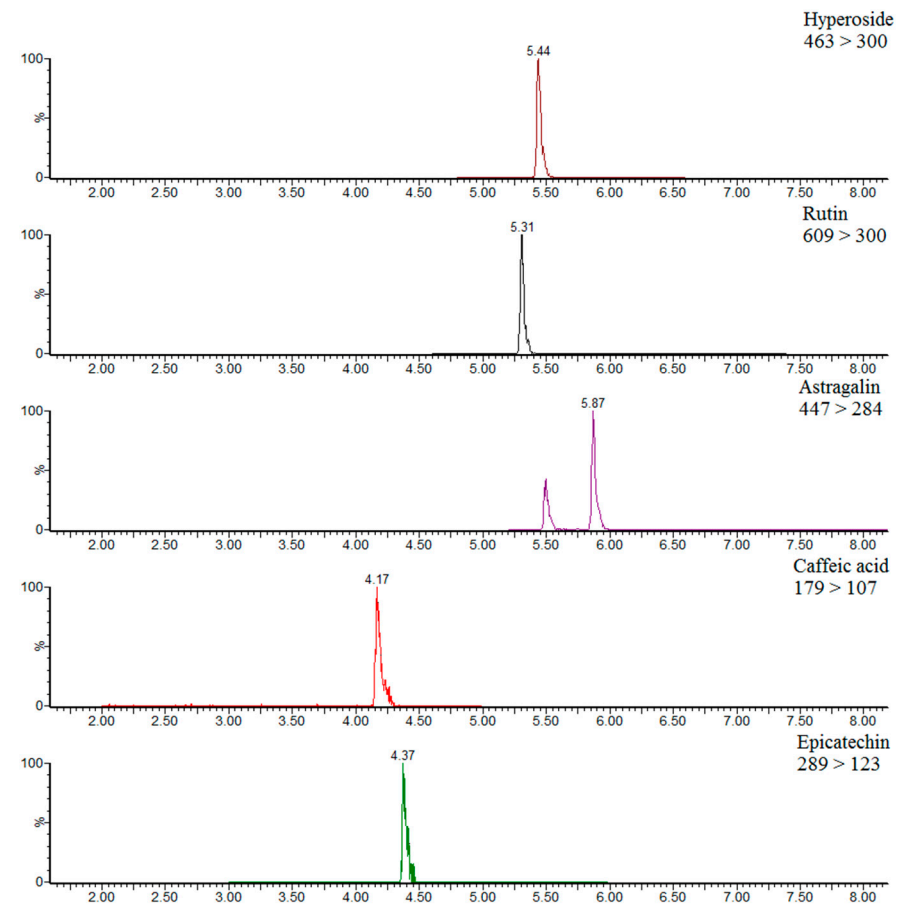

(B)

**Figure S3.** MS/MS chromatograms of *A. kolomikta* (A) and phenolic compounds standard mixture (B): hyperoside, rutin, kaempferol-3-*O*-glucoside, caffeic acid, and epicatechin.
